# Supplementary material
Source: PubMed Central journal article supplement (PMC9511501)
Supplement: NIHMS1824138-supplement-Supplement.pdf [file NIHMS1824138-supplement-Supplement.pdf]

## **SUPPLEMENTARY INFORMATION**

### **Older Age and Obesity are Associated with Increased Airway Closure in Response to Methacholine in Patients with Asthma**

David A. Kaminsky, MD, David G. Chapman, PhD, Janet T. Holbrook, PhD, Robert Henderson, MS, Elizabeth A. Sugar, PhD, John Mastronade, MD, W. Gerald Teague, MD, Michael Busk, MD, Kaharu Sumino, MD, Anne E. Dixon, MD, Robert A. Wise, MD, Charles G. Irvin, PhD

<sup>1</sup> University of Vermont Larner College of Medicine, Burlington, VT, USA

<sup>2</sup> Translational Airways Group, School of Life Sciences, University of Technology Sydney, NSW, Australia

<sup>3</sup> Woolcock Institute of Medical Research, NSW, Australia

<sup>4</sup> Department of Epidemiology, Bloomberg School of Public Health, Johns Hopkins University, Baltimore, MD, USA

<sup>5</sup> Providence Portland Medical Center, Portland, OR, USA

<sup>6</sup> University of Virginia, Charlottesville, VA, USA

<sup>7</sup> St. Vincent Hospital and Health Care Center, Inc., Indianapolis, IN, USA

<sup>8</sup> Washington University, St. Louis, MO, USA

**Figure S1** – Distribution of Closing Index Among Participants with Airways

Hyperresponsiveness ( $PC_{20} \leq 8$  mg/ml).

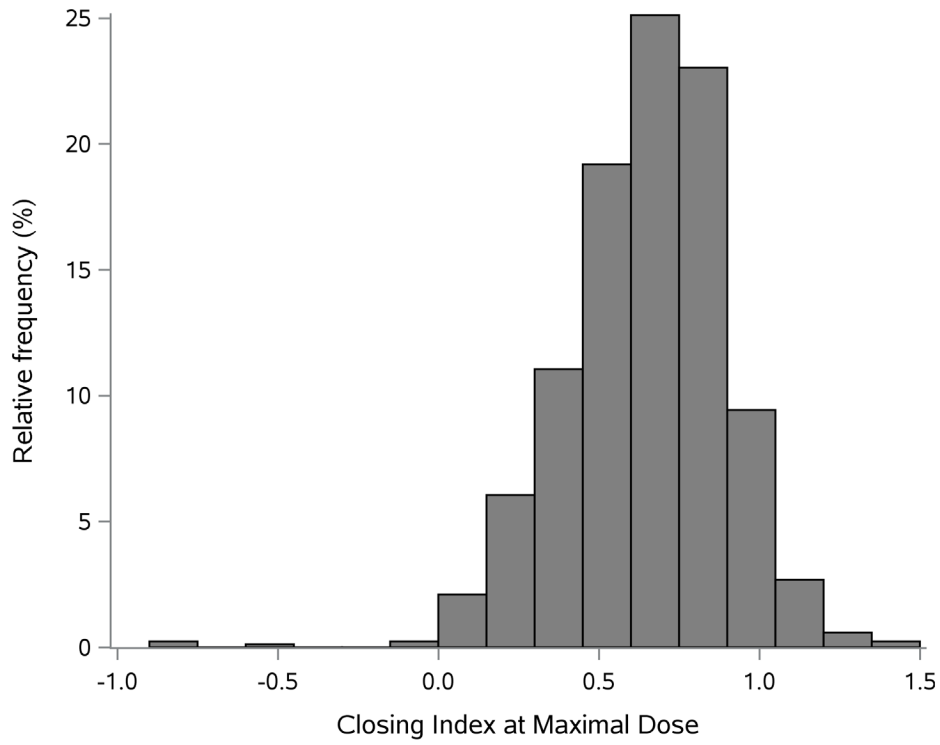

**Figure S2** - Difference between Closing Index Calculated Using the Maximal Dose vs. the PC20 Dose Relative to the Percent Change in FEV1 at the Maximal Dose of Methacholine.

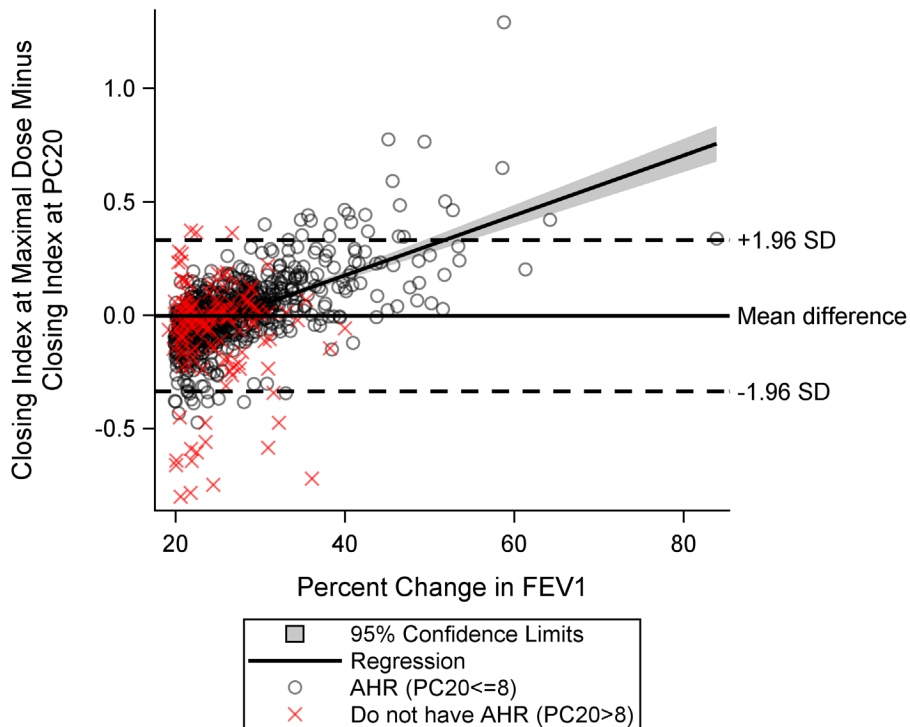

The diagonal, solid line represents the regression line and the shaded regions represent the 95 % confidence interval for the regression. The coefficient estimate for the regression = 0.0129 (0.0115, 0.0143). The horizontal, dashed lines represent the upper and lower bounds of the 95% confidence interval (+/- 1.96 SD) for the raw data compared to a mean difference of zero. Circles denote participants with airways hyperresponsiveness (AHR), defined as PC20 < 8mg/ml. X's denote participants without AHR.

**Table S1-** Number of Participants in Each Phase of Each Study

| Study<br>(Years of Study) | SARA<br>2004-07 | SARCA<br>2007-11 | STAN<br>2010-13 | MECIS<br>2009-10 | CPAP<br>2012-14 |
|---------------------------|-----------------|------------------|-----------------|------------------|-----------------|
| Total<br>Participants     | 402             | 306              | 388             | 126              | 194             |
| Tested for<br>PC20*       | 183             | 233              | 314             | 120              | 194             |
| Achieved PC20             | 175             | 214              | 259             | 102              | 194             |
| PC20 $\leq$ 8 mg/ml       | 135             | 175              | 223             | 90               | 181             |

\*Having a positive PC20 was not a requirement of all studies, as some inclusion criteria required either a positive PC20 or a positive bronchodilator response.

SARA (Study of Acid Reflux and Asthma) (S1)

n = 402 adults, poorly controlled asthma, randomized to protein pump inhibitor (PPI) vs. placebo. ClinicalTrials.gov Identifier: NCT00069823

SARCA (Study of Acid Reflux in Childhood Asthma) (S2)

n = 306 children, poorly controlled asthma, randomized to PPI vs. placebo. ClinicalTrials.gov Identifier: NCT00442013

STAN (Study of Asthma and Nasal Steroids) (S3)

n = 388 children and adults, poorly controlled asthma, randomized to nasal inhaled corticosteroids vs. placebo. ClinicalTrials.gov Identifier: NCT01118312

MeCIS (Methacholine Bronchoprovocation – Influence of High-Potency Inhaled Corticosteroids in Asthma) (S4, S5)

n = 126 adults, physician-diagnosis of stable asthma vs. healthy controls  
n = 26 asthmatics with PC20  $\leq$  8 mg/ml, on same ICS dose with 2 or 3 repeat PC20 at 4 week intervals. ClinicalTrials.gov Identifier: NCT00705341

CPAP (Effect of Positive Airway Pressure on Reducing Airway Reactivity in Patients with Asthma) (S6)

n = 194 adults, stable asthma, inclusion by PC20  $\leq$  8 mg/ml, randomized to continuous positive airway pressure (CPAP) vs. placebo (sham). ClinicalTrials.gov Identifier: NCT01629823

**Table S2 - Demographics and Baseline Pulmonary Function of Study Participants with Airways Hyperresponsiveness (PC20 ≤ 8)**

| Characteristic                                  | Total (N= 860)    | CPAP†<br>(N= 194) | MeCIS†<br>(N= 96) | SARA†<br>(N= 147) | SARCA†<br>(N= 186) | STAN†<br>(N= 237) | P-Value* |
|-------------------------------------------------|-------------------|-------------------|-------------------|-------------------|--------------------|-------------------|----------|
| Age, Median(Q1,Q3)                              | 25 (14, 40)       | 31 (20, 41)       | 41 (27, 51)       | 36 (26, 46)       | 12 (9, 14)         | 22 (12, 37)       | <.001    |
| Male, N(%)                                      | 377 (44%)         | 81 (42%)          | 35 (36%)          | 40 (27%)          | 116 (62%)          | 105 (44%)         | <.001    |
| Race, N(%)                                      |                   |                   |                   |                   |                    |                   |          |
| White                                           | 387 (45%)         | 85 (44%)          | 54 (56%)          | 79 (54%)          | 66 (35%)           | 103 (43%)         | 0.002    |
| Black                                           | 321 (37%)         | 62 (32%)          | 32 (33%)          | 54 (37%)          | 86 (46%)           | 87 (37%)          |          |
| Hispanic                                        | 115 (13%)         | 36 (19%)          | 8 (8%)            | 11 (7%)           | 23 (12%)           | 37 (16%)          |          |
| Other                                           | 37 (4%)           | 11 (6%)           | 2 (2%)            | 3 (2%)            | 11 (6%)            | 10 (4%)           |          |
| Age Asthma Onset, Median (Q1,Q3)                | 5 (2, 13)         | 8 (3, 15)         | 12 (4, 31)        | 8 (3, 23)         | 2 (1, 5)           | 5 (1, 12)         | <.001    |
| BMI for adults ≥20, Median (Q1,Q3)              | 28 (25, 33)       | 26 (23, 30)       | 28 (25, 34)       | 30 (25, 35)       |                    | 30 (25, 36)       | <.001    |
| BMI percentage for children <20, Median (Q1,Q3) | 84 (52, 96)       | 68 (42, 90)       | 61 (41, 93)       | 97 (86, 99)       | 85 (58, 96)        | 87 (57, 97)       | 0.014    |
| Obese**, N(%)                                   | 307 (36%)         | 41 (21%)          | 38 (40%)          | 69 (47%)          | 59 (32%)           | 99 (42%)          | <.001    |
| On ICS/LABA, N(%)                               | 400 (47%)         | 54 (28%)          | 53 (55%)          | 111 (76%)         | 108 (58%)          | 74 (31%)          | <.001    |
| Questionnaires, Median (Q1,Q3)                  |                   |                   |                   |                   |                    |                   |          |
| Asthma Control Questionnaire                    | 1.6 (1.0, 2.1)    |                   | 1.0 (0.6, 1.6)    | 1.9 (1.6, 2.4)    |                    |                   | <.001    |
| ACT Score                                       | 19 (16, 22)       | 22 (20, 23)       |                   |                   | 18 (16, 21)        | 16 (13, 18)       | <.001    |
| ACT ≤19                                         | 284 (61%)         | 46 (24%)          |                   |                   | 57 (64%)           | 181 (100%)        | <.001    |
| Child ACT score                                 | 18 (15, 20)       |                   |                   |                   | 19 (16, 22)        | 17 (13, 18)       | <.001    |
| CACT ≤19                                        | 105 (70%)         |                   |                   |                   | 49 (53%)           | 56 (100%)         | <.001    |
| ASUI                                            | 0.83 (0.69, 0.92) | 0.92 (0.84, 0.98) |                   | 0.77 (0.63, 0.86) | 0.83 (0.72, 0.89)  | 0.75 (0.60, 0.87) | <.001    |
| Spirometry, Median(Q1,Q3)                       |                   |                   |                   |                   |                    |                   |          |
| % Pred FEV <sub>1</sub> , Pre-BD                | 90 (82, 99)       | 91 (83, 98)       | 85 (78, 93)       | 87 (80, 96)       | 94 (86, 103)       | 89 (81, 102)      | <.001    |
| % Pred FVC, Pre-BD                              | 99 (90, 107)      | 101 (91, 108)     | 96 (87, 105)      | 94 (87, 103)      | 101 (92, 111)      | 100 (91, 109)     | <.001    |

| Characteristic                            | Total (N= 860)    | CPAP†<br>(N= 194) | MeCIS†<br>(N= 96) | SARA†<br>(N= 147) | SARCA†<br>(N= 186) | STAN†<br>(N= 237) | P-Value* |
|-------------------------------------------|-------------------|-------------------|-------------------|-------------------|--------------------|-------------------|----------|
| FEV FVC ratio, Pre-BD                     | 0.77 (0.72, 0.82) | 0.76 (0.71, 0.81) | 0.74 (0.69, 0.80) | 0.77 (0.72, 0.81) | 0.81 (0.76, 0.86)  | 0.77 (0.72, 0.81) | <.001    |
| % Change FEV1 from MC, last challenge     | 25 (22, 29)       | 24 (22, 28)       | 23 (21, 27)       | 28 (23, 33)       | 25 (23, 29)        | 24 (22, 29)       | <.001    |
| % Change FVC from MC, last challenge      | 17 (12, 22)       | 17 (12, 22)       | 17 (11, 21)       | 22 (16, 26)       | 16 (12, 22)        | 15 (10, 20)       | <.001    |
| % Change FEV from MC, at PC20             | 20 (20, 20)       | 20 (20, 20)       | 20 (20, 20)       | 20 (20, 20)       | 20 (20, 20)        | 20 (20, 20)       | 0.110    |
| % Change FVC from MC, at PC20             | 13 (10, 16)       | 13 (10, 16)       | 14 (10, 17)       | 15 (11, 17)       | 13 (9, 15)         | 13 (9, 16)        | 0.003    |
| Other respiratory measures, Median(Q1,Q3) |                   |                   |                   |                   |                    |                   |          |
| PC20                                      | 0.75 (0.25, 2.27) | 0.75 (0.24, 1.90) | 1.02 (0.33, 3.32) | 0.76 (0.29, 2.30) | 0.82 (0.28, 2.61)  | 0.59 (0.18, 2.03) | 0.026    |
| Closing Index at last challenge           | 0.67 (0.49, 0.81) | 0.68 (0.51, 0.82) | 0.69 (0.49, 0.83) | 0.74 (0.62, 0.88) | 0.62 (0.48, 0.79)  | 0.62 (0.43, 0.78) | <.001    |
| Closing Index at PC20                     | 0.66 (0.49, 0.82) | 0.66 (0.48, 0.80) | 0.68 (0.52, 0.83) | 0.74 (0.56, 0.87) | 0.63 (0.46, 0.77)  | 0.63 (0.46, 0.80) | 0.003    |

P-values are based upon Chi-squared and Kruskal-Wallis tests for categorical and continuous characteristics, respectively

† acronyms for clinical studies included: CPAP = Effect of Positive Airway Pressure on Reducing Airway Reactivity in Patients with Asthma; MeCIS = Methacholine Bronchoprovocation – Influence of High-Potency Inhaled Corticosteroids in Asthma; SARA = Study of Acid Reflux and Asthma; SARCA = Study of Acid Reflux in Childhood Asthma; STAN = Study of Asthma and Nasal Steroids

\*\*obesity defined as BMI > 30 kg/m<sup>2</sup> in adults (≥ 20 years old), and BMI > 95<sup>th</sup> percentile in children (< 20 years old)

#### Abbreviations:

ACT = Asthma Control Test (Low scores indicate better health), ASUI = Asthma Symptom Utility Index (High scores indicate better health), FEV1 = forced expiratory volume in one second, FVC = forced vital capacity, MC = methacholine challenge, PC20 = provocative concentration causing a 20% fall in FEV1

#### Missing Data:

-ACT: was not done in MeCIS, or SARA, or children in SARCA or STAN (Total N=464)

-cACT was only done in children in SARCA & STAN (Total N=149)

-ASUI: not done in MeCIS, missing one subject from SARCA (Total N=763)

\*P-values are based upon Chi-squared and Kruskal-Wallis tests for categorical and continuous characteristics, respectively

↑ High scores indicate better health

↓ Low scores indicate better health

Table S3 – Results of Univariate Regression  
Modeling of Closing Index for Participants with  
Airways Hyperresponsiveness

| <i>Characteristic</i>                          | <i>Regression Coefficient<br/>(95% CI)</i> | <i>P-Value</i> |
|------------------------------------------------|--------------------------------------------|----------------|
| Age (10 year intervals)                        | 0.032 (0.022, 0.043)                       | <.001          |
| Male (vs. Female)                              | -0.048 (-0.082, -0.015)                    | 0.005          |
| Black (vs. White)                              | -0.017 (-0.052, 0.018)                     | 0.334          |
| Hispanic (vs. White)                           | -0.027 (-0.077, 0.023)                     | 0.288          |
| Other race (vs. White)                         | 0.059 (-0.024, 0.143)                      | 0.163          |
| Age of Asthma Onset                            | 0.003 (0.002, 0.005)                       | <.001          |
| BMI for adults 20 years or older               | 0.005 (0.002, 0.008)                       | <.001          |
| BMI percentile for children <20 years          | 0.001 (0, 0.002)                           | 0.006          |
| Obese (vs. not)                                | 0.076 (0.041, 0.111)                       | <.001          |
| On ICS/LABA (vs. not)                          | 0.035 (0.001, 0.069)                       | 0.042          |
| Asthma Control Questionnaire                   | 0.015 (-0.024, 0.053)                      | 0.459          |
| Asthma Control Test (ACT) score                | 0.002 (-0.004, 0.008)                      | 0.502          |
| ACT score ≤ 19 (vs. 20 or more)                | -0.017 (-0.064, 0.03)                      | 0.483          |
| Child ACT score                                | 0.006 (-0.003, 0.014)                      | 0.195          |
| Child ACT score ≤ 19 (vs. 20 or more)          | -0.075 (-0.16, 0.01)                       | 0.084          |
| Adult or Child ACT score ≤ 19 (vs. 20 or more) | -0.03 (-0.071, 0.012)                      | 0.160          |
| Asthma Symptom Utility Index (ASUI)            | 0.042 (-0.062, 0.145)                      | 0.429          |
| % Pred FEV <sub>1</sub> , Pre-BD               | -0.001 (-0.003, 0)                         | 0.016          |
| % Pred FVC, Pre-BD                             | -0.003 (-0.004, -0.002)                    | <.001          |
| FEV <sub>1</sub> /FVC ratio, Pre-BD            | 0.092 (-0.126, 0.31)                       | 0.407          |
| PC20                                           | 0.006 (0.001, 0.011)                       | 0.014          |
| Study, Ref.=STAN                               |                                            |                |
| CPAP                                           | 0.012 (-0.028, 0.053)                      | 0.551          |
| MeCIS                                          | 0.001 (-0.053, 0.055)                      | 0.974          |
| SARA                                           | 0.105 (0.061, 0.15)                        | <.001          |
| SARCA                                          | -0.02 (-0.061, 0.022)                      | 0.350          |

Abbreviations as for Table S2

Table S4 – Results of Multivariable Regression Modeling of Closing Index for Participants with Airways Hyperresponsiveness

| <i>Characteristic</i>  | <i>Estimate (95% CI)</i> | <i>P-Value</i> |
|------------------------|--------------------------|----------------|
| Age (10 year units)    | 0.032 (0.018, 0.045)     | <.001          |
| Male (vs. female)      | -0.019 (-0.053, 0.015)   | 0.274          |
| Black (vs. white)      | -0.016 (-0.053, 0.02)    | 0.379          |
| Hispanic (vs. white)   | -0.002 (-0.053, 0.05)    | 0.954          |
| Other race (vs. white) | 0.068 (-0.014, 0.15)     | 0.105          |
| Obese (vs. not)        | 0.062 (0.027, 0.097)     | <.001          |
| Study, Ref.=STAN       |                          |                |
| CPAP                   | 0.053 (0.006, 0.101)     | 0.027          |
| McCIS                  | 0.011 (-0.048, 0.071)    | 0.709          |
| SARA                   | 0.1 (0.048, 0.152)       | <.001          |
| SARCA                  | 0.091 (0.041, 0.142)     | <.001          |

Table S5 – Covariates Removed from Multivariable Regression Modeling of Closing Index for All Participants

| <i>Characteristic</i> | <i>Estimate (95% CI)</i> | <i>P-Value</i> |
|-----------------------|--------------------------|----------------|
| Age onset             | 0.001 (-0.001, 0.002)    | 0.347          |
| On ICS/LABA (vs. not) | 0.019 (-0.014, 0.053)    | 0.260          |

Table S6 – Covariates Removed from Multivariable Regression Modeling of Closing Index for Participants with Airways Hyperresponsiveness (Table S4)

| <i>Characteristic</i> | <i>Estimate (95% CI)</i> | <i>P-Value</i> |
|-----------------------|--------------------------|----------------|
| Age onset             | 0.001 (-0.001, 0.003)    | 0.271          |
| On ICS/LABA (vs. not) | 0.012 (-0.024, 0.047)    | 0.509          |



Table S7 – Results of Multivariable Regression Modeling of Closing Index for All Child Participants, N=172

| <i>Characteristic</i>                  | <i>Estimate (95% CI)</i> | <i>P-Value</i> |
|----------------------------------------|--------------------------|----------------|
| Male (vs. Female)                      | 0.005 (-0.07, 0.08)      | 0.900          |
| Black (vs. White)                      | 0.03 (-0.05, 0.11)       | 0.449          |
| Hispanic (vs. White)                   | 0.04 (-0.07, 0.15)       | 0.480          |
| Other race (vs. White)                 | 0.1 (-0.04, 0.24)        | 0.169          |
| Obese (vs. not)                        | 0.07 (0, 0.15)           | 0.062          |
| Child ACT score <= 19 (vs. 20 or more) | -0.08 (-0.16, -0.01)     | 0.034          |

Table S8 – Results of Multivariable Regression Modeling of Closing Index for Child Participants with Airways Hyperresponsiveness, N=149

| <i>Characteristic</i>                  | <i>Estimate (95% CI)</i> | <i>P-Value</i> |
|----------------------------------------|--------------------------|----------------|
| Male (vs. Female)                      | -0.004 (-0.08, 0.08)     | 0.925          |
| Black (vs. White)                      | 0.03 (-0.06, 0.12)       | 0.517          |
| Hispanic (vs. White)                   | 0.04 (-0.07, 0.16)       | 0.492          |
| Other race (vs. White)                 | 0.15 (-0.01, 0.32)       | 0.074          |
| Obese (vs. not)                        | 0.07 (-0.01, 0.15)       | 0.094          |
| Child ACT score <= 19 (vs. 20 or more) | -0.08 (-0.17, 0)         | 0.059          |

Table S9 – Results of Multivariable Negative Binomial Regression Modeling of EPACS for Participants with Airways Hyperresponsiveness who had Diary Card Data, N=791

| <i>Characteristic</i>  | <i>Risk Ratio (95% CI)</i> | <i>P-Value</i> |
|------------------------|----------------------------|----------------|
| Closing Index          | 1.01 (0.64, 1.58)          | 0.977          |
| Age (10 year units)    | 0.93 (0.85, 1.02)          | 0.118          |
| Male (vs. Female)      | 0.73 (0.58, 0.92)          | 0.007          |
| Black (vs. White)      | 1.44 (1.14, 1.82)          | 0.002          |
| Hispanic (vs. White)   | 0.84 (0.59, 1.2)           | 0.338          |
| Other race (vs. White) | 1.53 (0.9, 2.6)            | 0.118          |
| Obese (vs. not)        | 0.96 (0.76, 1.21)          | 0.723          |
| Study, Ref.=STAN       |                            |                |
| CPAP                   | 0.65 (0.46, 0.92)          | 0.015          |
| McCIS                  | 0.53 (0.3, 0.96)           | 0.035          |

| <i>Characteristic</i> | <i>Risk Ratio (95% CI)</i> | <i>P-Value</i> |
|-----------------------|----------------------------|----------------|
| SARA                  | 1.18 (0.86, 1.61)          | 0.308          |
| SARCA                 | 1.29 (0.95, 1.76)          | 0.108          |

### **Supplementary References**

- S1. Mastronade J, Anthonisen N, Castro M, Holbrook J, Leone F, Teague W, Wise R. Efficacy of esomeprazole for treatment of poorly controlled asthma. *N Engl J Med* 2009; 360: 1487-1499.
- S2. Holbrook J, Wise R, Gold B, Blake K, Brown E, Castro M, Dozor A, Lima J, Mastronade J, Sockrider M, Teague W. Lansoprazole for children with poorly controlled asthma. *JAMA* 2012; 307: 373-381.
- S3. Dixon A, Castro M, Cohen R, Gerald L, Holbrook J, Irvin C, Mohapatra S, Peters S, Rayapudi S, Sugar E, Wise R. Efficacy of nasal mometasone for the treatment of chronic sinonasal disease in patients with inadequately controlled asthma. *J Allergy Clin Immunol* 2015; 135: 701-709.
- S4. Sumino K, Sugar E, Irvin C, Kaminsky D, Shade D, Wei C, Holbrook J, Wise R, Castro M. Methacholine challenge test: diagnostic characteristics in asthmatic patients receiving controller medications. *J Allergy Clin Immunol* 2012; 130: 69-75.
- S5. Sumino K, Sugar E, Irvin C, Kaminsky D, Shade D, Wei C, JT H, Wise R, Castro M. Variability of methacholine bronchoprovocation and the effect of inhaled corticosteroids in mild asthma. *Ann Allergy Asthma Immunol* 2014; 112: 354-360.
- S6. Holbrook J, Sugar E, Brown R, Drye L, Schwartz A, Tepper R, Wise R, Yasin R, Busk M. Effect of continuous positive airway pressure on reducing airway reactivity in patients with asthma: A multicenter, randomized, sham-controlled clinical trial. *Ann Am Thorac Soc* 2016;13:1940-1950.
